# Supplementary material for: A novel naphthyl side-chained benzodithiophene polymer for efficient photovoltaic cells with a high fill factor of 75%
Source: Royal Society of Chemistry journal article supplement (doi:10.1039/c7ta01994g), 2017-01-01

## Supplementary Information

### **Novel naphthyl side-chained benzodithiophene polymer for efficient photovoltaic cells with a high fill factor of 75%**

Dakang Ding,<sup>†ab</sup> Jiuxing Wang,<sup>†bd</sup> Zurong Du,<sup>b</sup> Feng Li,<sup>c</sup> Weiye Chen,<sup>a</sup> Fushuai Liu,<sup>a</sup>  
Haiyan Li,<sup>a</sup> Mingliang Sun<sup>\*a</sup> and Renqiang Yang<sup>\*b</sup>

<sup>a</sup>. Institute of Materials Science and Engineering, Ocean University of China, Qingdao 266100, China. \*E-mail: mlsun@ouc.edu.cn

<sup>b</sup>. CAS Key Laboratory of Bio-based Materials, Qingdao Institute of Bioenergy and Bioprocess Technology, Chinese Academy Science, Qingdao 266101, China. \*E-mail: yangrq@qibebt.ac.cn

<sup>c</sup>. Key Laboratory of Rubber-Plastics of Ministry of Education/Shandong Province, School of Polymer Science and Engineering, Qingdao University of Science & Technology, 53 Zhengzhou Road, Qingdao 266042, China

<sup>d</sup>. Institute of Hybrid Materials, College of Materials Science and Engineering, Qingdao University, Qingdao 266071, China.

<sup>†</sup> Dakang Ding and Jiuxing Wang contributed equally to this work.

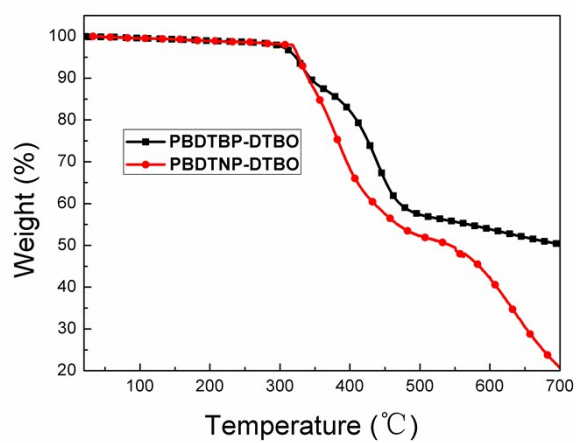

Fig.S1 TGA plot of two polymers

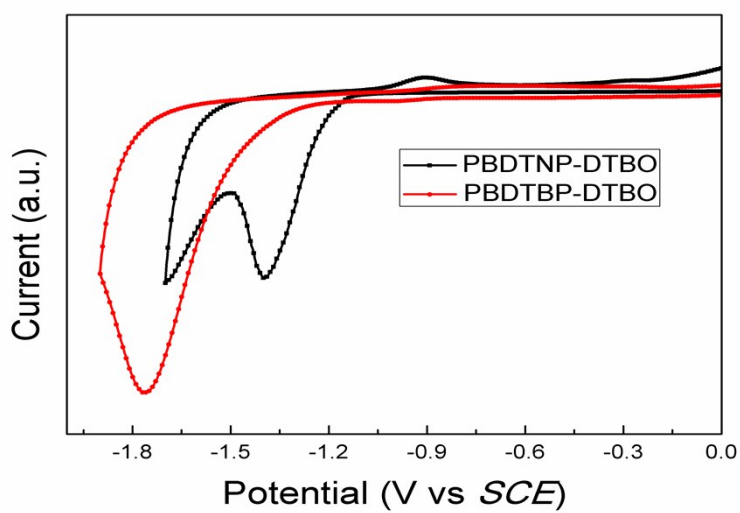

Fig.S2 Electrochemical cyclic voltammograms of two polymers

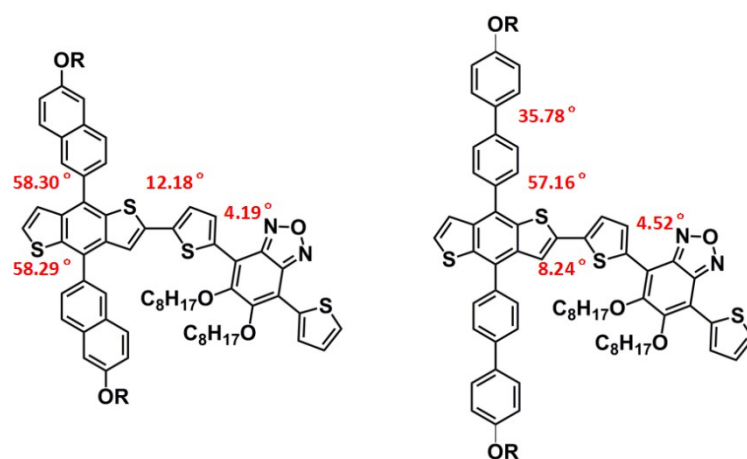

Fig. S3 The main dihedral angles of PBDTNP-DTBO and PBDTBP-DTBO

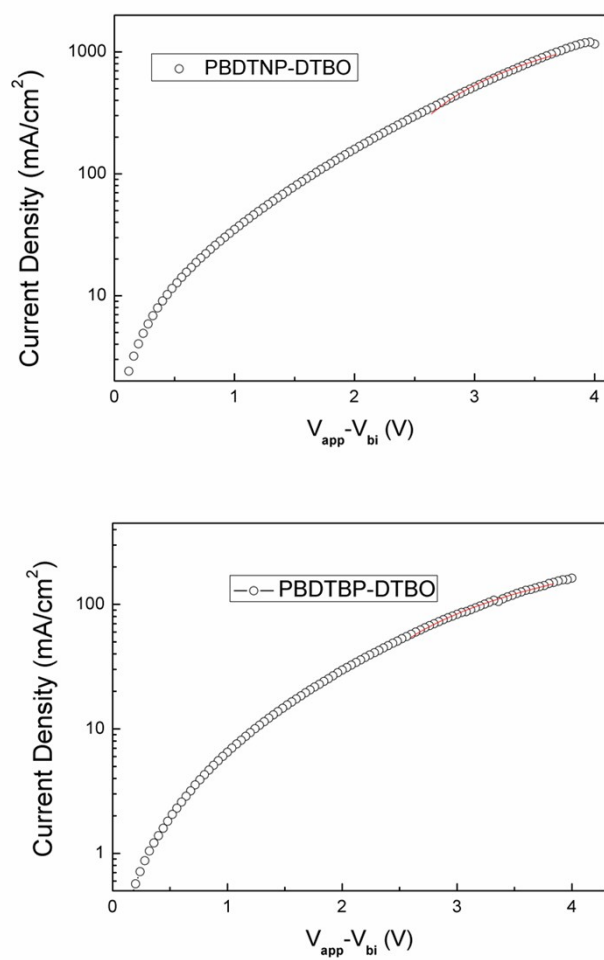

Fig.S4 Hole mobility characteristics of PBDTNP-DTBO/PBDTBP-DTBO and PC<sub>71</sub>BM (1:2)

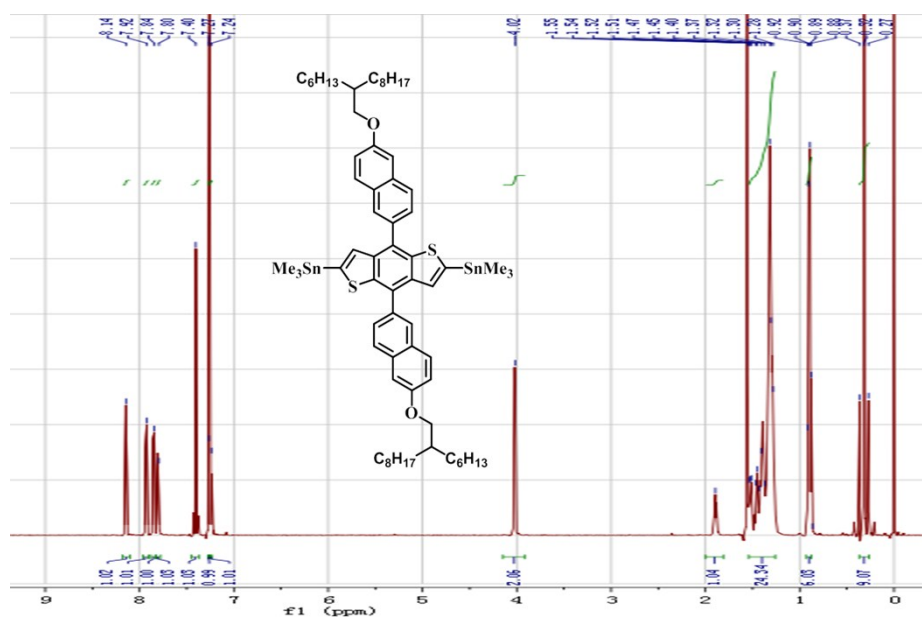

Fig. S5 <sup>1</sup>H NMR spectra of BDTNPSn

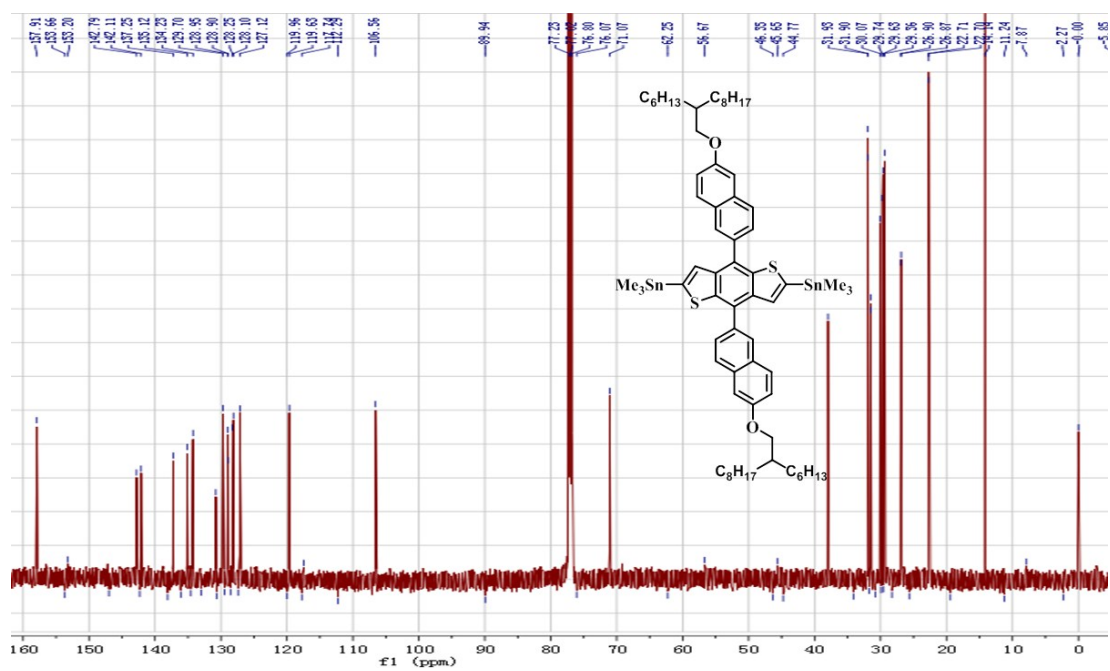

Fig. S6 <sup>13</sup>C NMR spectra of BDTNPSn

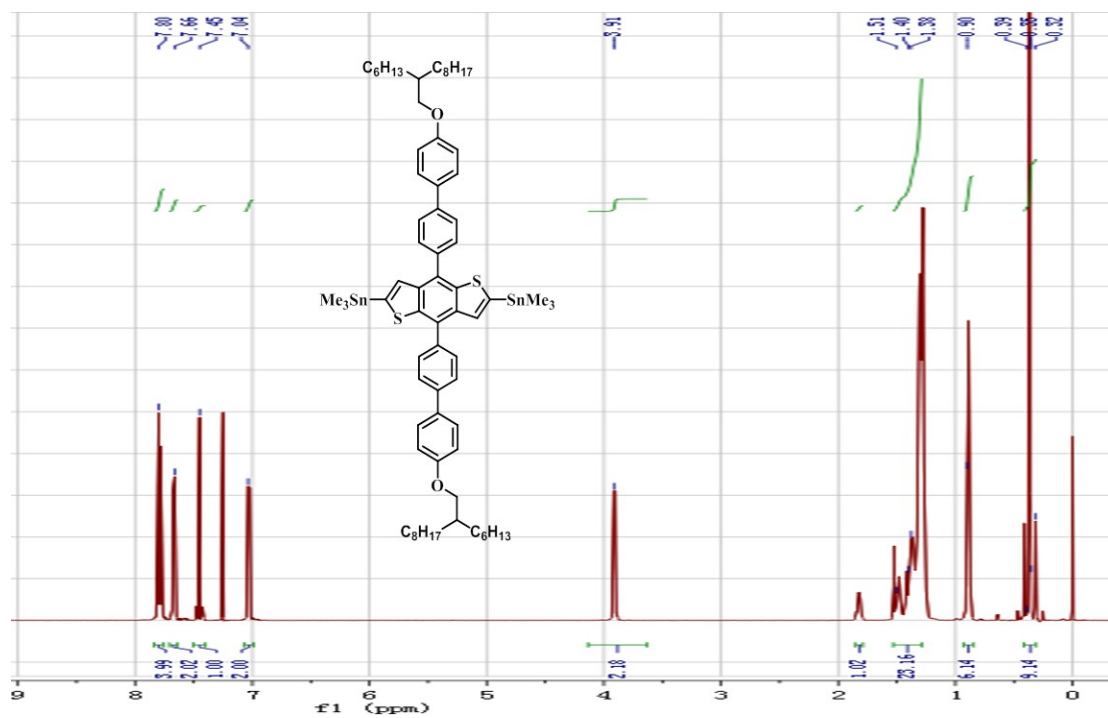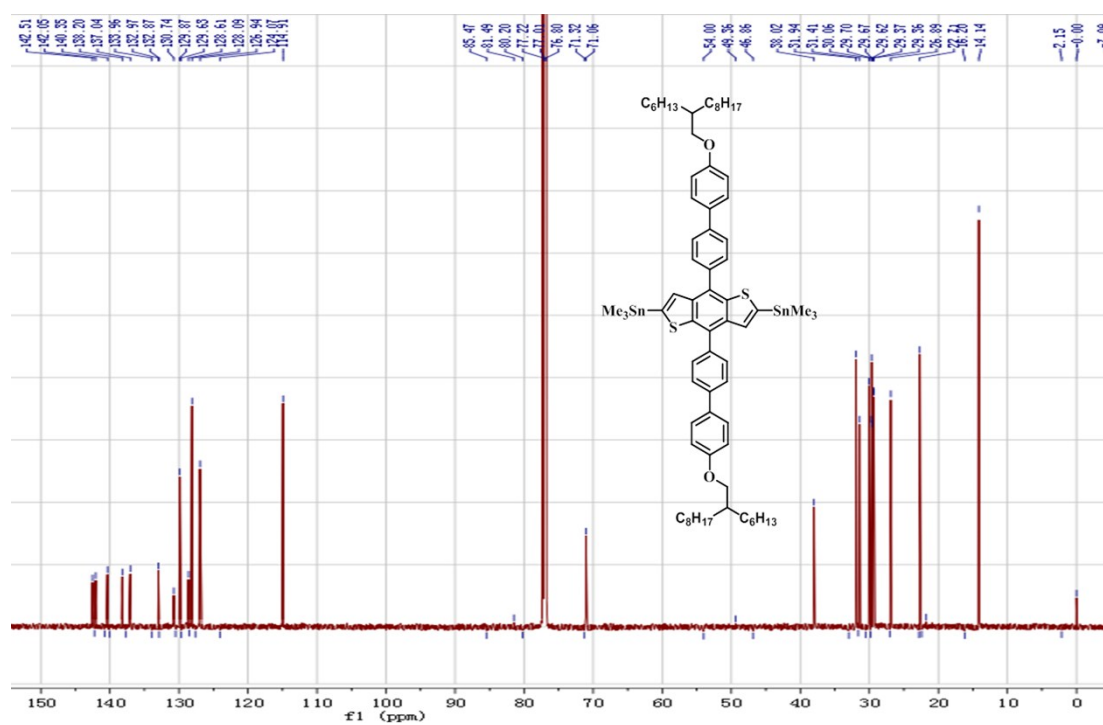

Supplement: c7ta01994g1.pdf [file c7ta01994g1.pdf]
